# Supplementary material for: Robust luminescent small molecules with aggregation-induced delayed fluorescence for efficient solution-processed OLEDs
Source: Royal Society of Chemistry journal article supplement (doi:10.1039/c8tc04842h), 2018-11-29
Supplement: c8tc04842h1.pdf [file c8tc04842h1.pdf]

## ***Electronic Supplementary Information (ESI)***

### **Materials and Instruments**

All the chemicals and reagents were purchased from commercial sources and used as received without further purification.  $^1\text{H}$  and  $^{13}\text{C}$  NMR spectra were measured on a Bruker AV 500 spectrometer in  $\text{CDCl}_3$  at room temperature. High resolution mass spectra (HRMS) were recorded on a GCT premier CAB048 mass spectrometer operating in MALDI-TOF mode. Single crystals of CC6-DBP-PXZ were grown in  $\text{CH}_2\text{Cl}_2$ -methanol mixtures and single crystal X-ray diffraction intensity data were collected at 173 K on a Bruker–Nonices Smart Apex CCD diffractometer with graphite monochromated  $\text{MoK}\alpha$  radiation. Processing of the intensity data was carried out using the SAINT and SADABS routines, and the structure and refinement were conducted using the SHELTL suite of X-ray programs (version 6.10). UV-vis absorption spectra were measured on a Shimadzu UV-2600 spectrophotometer. PL spectra were recorded on a Horiba Fluoromax-4 spectrofluorometer. PL quantum yields were measured using a Hamamatsu absolute PL quantum yield spectrometer C11347 Quantaaurus\_QY. The ground-state geometries were optimized using the density function theory (DFT) method with BMK hybrid functional at the basis set level of 6-31G\*, and then the  $\Delta E_{\text{ST}}$  values were calculated by time-dependent DFT (TDDFT) method at the same level. All the calculations were performed using Gaussian09 package.

### **Additional Spectra**

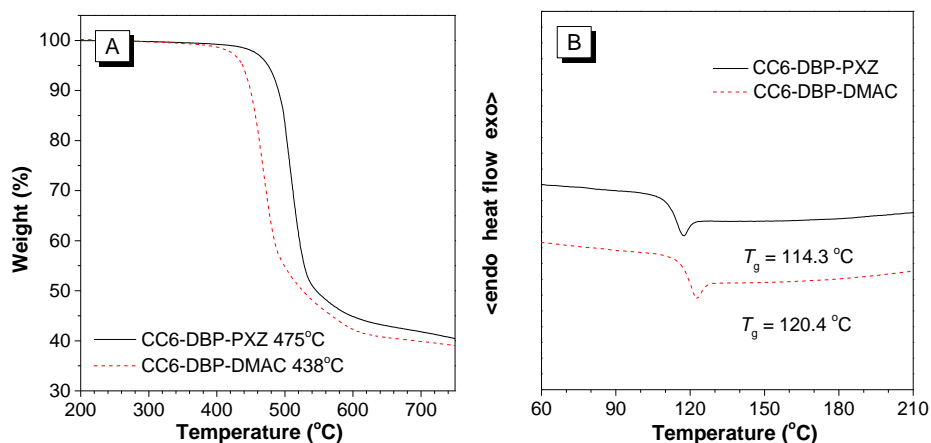

**Fig. S1** (A) TGA and (B) DSC thermograms of CC6-DBP-PXZ and CC6-DBP-DMAC, measured under nitrogen at a heating rate of 20 and 10  $^\circ\text{C min}^{-1}$ , respectively.

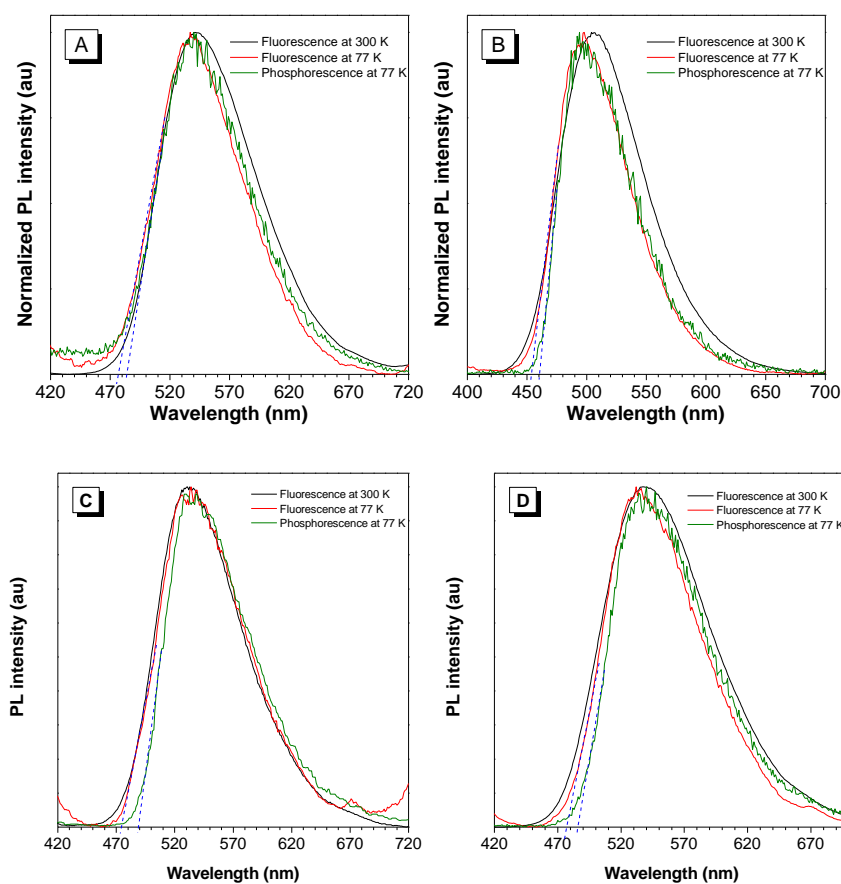

**Fig. S2** Fluorescence and phosphorescence spectra of (A) CC6-DBP-PXZ neat film, (B) CC6-DBP-DMAC neat film, (C) 30 wt% CC6-DBP-PXZ:CBP doped film and (D) 30 wt% CC6-DBP-DMAC:CBP doped film.

## Estimation of Basic Photophysical Data

The quantum efficiencies and rate constants were determined using the following equations according to the following equations:

$$\Phi_{\text{prompt}} = \Phi_{\text{F}} R_{\text{prompt}} \quad (1)$$

$$\Phi_{\text{delayed}} = \Phi_{\text{F}} R_{\text{delayed}} \quad (2)$$

$$k_{\text{F}} = \Phi_{\text{prompt}}/\tau_{\text{prompt}} \quad (3)$$

$$\Phi_{\text{F}} = k_{\text{F}}/(k_{\text{F}} + k_{\text{IC}}) \quad (4)$$

$$\Phi_{\text{prompt}} = k_{\text{F}}/(k_{\text{F}} + k_{\text{IC}} + k_{\text{ISC}}) \quad (5)$$

$$\Phi_{\text{IC}} = k_{\text{IC}}/(k_{\text{F}} + k_{\text{IC}} + k_{\text{ISC}}) \quad (6)$$

$$\Phi_{\text{ISC}} = k_{\text{ISC}}/(k_{\text{F}} + k_{\text{IC}} + k_{\text{ISC}}) = 1 - \Phi_{\text{prompt}} - \Phi_{\text{IC}} \quad (7)$$

$$\Phi_{\text{RISC}} = \Phi_{\text{delayed}}/\Phi_{\text{ISC}} \quad (8)$$

$$k_{\text{RISC}} = (k_{\text{p}}k_{\text{d}}\Phi_{\text{delayed}})/(k_{\text{ISC}}\Phi_{\text{prompt}}) \quad (9)$$

$$k_{\text{p}} = 1/\tau_{\text{prompt}}; k_{\text{d}} = 1/\tau_{\text{delayed}} \quad (10)$$

**Table S1.** Transient PL decay data of THF solutions and neat films of CC6-DBP-PXZ and CC6-DBP-DMAC at 300 K under nitrogen.<sup>a</sup>

| compound     | state        | $\langle\tau\rangle$ (ns) | $\tau_1$ (ns) | $\tau_2$ (ns) | A <sub>1</sub> | A <sub>2</sub> | $R_{\text{prompt}}$ (%) | $R_{\text{delayed}}$ (%) |
|--------------|--------------|---------------------------|---------------|---------------|----------------|----------------|-------------------------|--------------------------|
| CC6-DBP-PXZ  | THF solution | 2.0                       | 1.9           | 28.6          | 61783          | 15.048         | ~100                    | ~0                       |
|              | neat film    | 244.9                     | 22.9          | 1212.8        | 40350.8        | 175.0          | 81                      | 19                       |
| CC6-DBP-DMAC | THF solution | 60.7                      | 19.7          | 217.2         | 6505.02        | 154.58         | 79                      | 21                       |
|              | neat film    | 1294.8                    | 25.7          | 2882.1        | 31778          | 226.3          | 56                      | 44                       |

<sup>a</sup> The transient PL decay data were fitted by multiple-exponential function and the mean fluorescence lifetimes ( $\langle\tau\rangle$ ) were calculated by  $\langle\tau\rangle = \Sigma A_i \tau_i^2 / \Sigma A_i \tau_i$ , where A<sub>i</sub> is the pre-exponential for lifetime  $\tau_i$ .  $R_{\text{prompt}}$  and  $R_{\text{delayed}}$  are individual component ratio for prompt and delayed fluorescence.  $R_{\text{prompt}} = \tau_1 A_1 / (\tau_1 A_1 + \tau_2 A_2 + \tau_3 A_3)$ ,  $R_{\text{delayed}} = 1 - R_{\text{prompt}}$ .

**Table S2.** Photophysical data of neat films and doped films in CBP (30 wt%) of CC6-BP-PXZ and CC6-BP-DMAC.<sup>a</sup>

|                                                    | CC6-DBP-PXZ |               | CC6-DBP-DMAC |               |
|----------------------------------------------------|-------------|---------------|--------------|---------------|
|                                                    | neat film   | 30 wt% in CBP | neat film    | 30 wt% in CBP |
| $\Phi_F$ (%)                                       | 38.3        | 59.0          | 59.5         | 69.1          |
| $\tau_{\text{prompt}}$ (ns)                        | 22.9        | 24.5          | 25.7         | 29.4          |
| $\tau_{\text{delayed}}$ ( $\mu\text{s}$ )          | 1.2         | 1.6           | 2.9          | 6.4           |
| $R_{\text{delayed}}$ (%)                           | 19.0        | 28.6          | 44.0         | 43.4          |
| $\Phi_{\text{prompt}}$ (%)                         | 31.0        | 37.8          | 33.3         | 39.1          |
| $\Phi_{\text{delayed}}$ (%)                        | 7.3         | 15.2          | 26.2         | 30.0          |
| $\Phi_{\text{ISC}}$ (%)                            | 19.0        | 28.6          | 44.0         | 43.4          |
| $\Phi_{\text{RISC}}$ (%)                           | 38.4        | 53.0          | 59.5         | 69.1          |
| $k_F$ ( $\times 10^6 \text{ s}^{-1}$ )             | 13.5        | 15.4          | 13.0         | 13.3          |
| $k_{\text{IC}}$ ( $\times 10^6 \text{ s}^{-1}$ )   | 21.8        | 13.7          | 8.8          | 5.9           |
| $k_{\text{ISC}}$ ( $\times 10^6 \text{ s}^{-1}$ )  | 8.3         | 11.7          | 17.1         | 14.7          |
| $k_{\text{RISC}}$ ( $\times 10^6 \text{ s}^{-1}$ ) | 3.2         | 3.3           | 2.1          | 1.1           |

<sup>a</sup> Abbreviations:  $\Phi_{\text{PL}}$  = absolute photoluminescence quantum yield;  $\tau_{\text{prompt}}$  and  $\tau_{\text{delayed}}$  = lifetimes calculated from the prompt and delayed fluorescence decay, respectively;  $R_{\text{delayed}}$  = the ratio of delayed components;  $\Phi_{\text{prompt}}$  and  $\Phi_{\text{delayed}}$  = fluorescent and delayed components, respectively, determined from the total  $\Phi_{\text{PL}}$  and the proportion of the integrated area of each of the components in the transient spectra to the total integrated area;  $\Phi_{\text{ISC}}$  = the intersystem crossing quantum yield;  $K_F$  = fluorescence decay rate;  $K_{\text{IC}}$  = internal conversion decay rate from  $S_1$  to  $S_0$ ;  $K_{\text{ISC}}$  = intersystem crossing decay rate from  $S_1$  to  $T_1$ ;  $K_{\text{RISC}}$  = the rate constant of reverse intersystem crossing process.

**Table S3.** The theoretically calculated maximum  $\eta_{\text{ext}}$  values for nondoped OLEDs of CC6-DBP-PXZ and CC6-DBP-DMAC.

|              | $\Phi_{\text{prompt}}$ (%) | $\Phi_{\text{ISC}}$ (%) | $\Phi_{\text{RISC}}$ (%) | $\eta_{\text{ext}}^{\text{a}}$ (%) | $\eta_{\text{ext}}^{\text{b}}$ (%) |
|--------------|----------------------------|-------------------------|--------------------------|------------------------------------|------------------------------------|
| CC6-DBP-PXZ  | 31.0                       | 19.0                    | 38.4                     | 7.7-11.5                           | 7.73                               |
| CC6-DBP-DMAC | 33.3                       | 44.0                    | 59.5                     | 12.8-19.2                          | 9.02                               |

<sup>a</sup> Theoretical maximum  $\eta_{\text{ext}}$  values, calculated according to the following equations (1) and (2):

$$\eta_{\text{ext}} = \eta_{\text{int}} \times \eta_{\text{out}} \quad (1)$$

$$\eta_{\text{int}} = \gamma \times [\eta_S \times \Phi_{\text{prompt}} + (\eta_S \times \Phi_{\text{ISC}} + \eta_T) \times \Phi_{\text{RISC}}] \quad (2)$$

where  $\eta_{\text{int}}$  denotes the internal quantum efficiency,  $\eta_{\text{out}}$  is the optical out-coupling factor (typically 0.2~0.3),  $\gamma$  is the charge balance factor (ideally  $\gamma = 1.0$ ), and  $\eta_S$  and  $\eta_T$  are the fractions of singlet and triplet excitons (25% and 75%, respectively).

<sup>b</sup> Experimental maximum  $\eta_{\text{ext}}$  values.
